# Supplementary material
Source: HighWire-hosted journal article supplement (https://rc.rcjournal.com/highwire/filestream/21627/field_highwire_adjunct_files/0/2021_AARC_Congress_PEEP_FIO2_Table_in_Children_with_PARDS.pdf)

# Ventilation on a PEEP/FIO<sub>2</sub> Combination Table in Children with Pediatric Acute Respiratory Distress Syndrome

Heng Lee Tan<sup>1</sup>; Yi-Jyun Ma<sup>1</sup>; Siew Wah Lee<sup>3</sup>, Apollo Bugarin Aguilan<sup>1</sup>; Yee Hui Mok<sup>1,2</sup>; Jan Hau Lee<sup>1,2</sup>; Judith Ju-Ming Wong<sup>1,2</sup>

<sup>1</sup>Children's Intensive Care Unit, Department of Pediatric Subspecialties, KK Women's and Children's Hospital. <sup>2</sup>Duke-NUS Medical School, Singapore. <sup>3</sup>Pediatric Intensive Care Unit, Hospital Kuala Lumpur, Malaysia.

## Introduction

- Limited data evaluating the use of PEEP/FIO<sub>2</sub> combinations in pediatric patients
- Aim: Describe PEEP/FIO<sub>2</sub> use in pediatric ARDS (PARDS) patients in relation to a PEEP/FIO<sub>2</sub> table modified from the ARDSNet protocol in the first 7 days of PARDS

## Methods

- Post-hoc analysis of data from a before-and-after comparison study of lung protective mechanical ventilation (MV) strategy in children with PARDS
  - Study period January 2016 to June 2019
- Time-matched PEEP and FIO<sub>2</sub> combinations for the first 7 days of ARDS were described in relation to the protocol
- Modified PEEP/FIO<sub>2</sub> table

|                  |      |      |      |      |      |      |      |
|------------------|------|------|------|------|------|------|------|
| FIO <sub>2</sub> | 0.30 | 0.40 | 0.40 | 0.50 | 0.50 | 0.60 | 0.70 |
| PEEP             | 5    | 5    | 8    | 8    | 10   | 10   | 10   |
| FIO <sub>2</sub> | 0.70 | 0.70 | 0.80 | 0.90 | 0.90 | 0.90 | 1.0  |
| PEEP             | 12   | 14   | 14   | 14   | 16   | 18   | 18   |

- PEEP/FIO<sub>2</sub> score = Median difference between the set PEEP and recommended PEEP for a given FIO<sub>2</sub> was calculated
- Logistic regression was used for the main outcome of PICU mortality adjusting for low tidal volume ventilation (3-6mL/kg)

## Results

- 115/137 (83.9%) children with PARDS required at least one conventional MV day
- Median OI on day 1 was 9.4 (IQR: 7.1, 14.4)
- There were a total of 522/814 (64.2%) conventional MV days
- PEEP/FIO<sub>2</sub> score was on target in 25/115 (21.7%), below target in 33/115 (28.7%) and above target in 57/115 (49.6%)
- After adjustment for low tidal volume ventilation, the PEEP/FIO<sub>2</sub> score was not significantly associated with mortality [OR 0.83 (95%CI 0.68, 1.03)]

Table 1. Patients' Demographics

| Characteristics           | Adequate PEEP (n=82)  | Inadequate PEEP (n=33)  | P value          |
|---------------------------|-----------------------|-------------------------|------------------|
| Age, years                | 2.8 (0.4, 10.5)       | 1.4 (0.5, 4.4)          | 0.397            |
| Male                      | 49 (59.8)             | 20 (60.6)               | 0.933            |
| Comorbidities             | 54 (65.9)             | 24 (72.7)               | 0.475            |
| Extrapulmonary            | 18 (22.0)             | 8 (24.2)                | 0.790            |
| PIM 2                     | 7.1 (3.8, 16.9)       | 8.4 (3.3, 20.3)         | 0.778            |
| PELOD                     | 10 (2, 21)            | 4 (2, 12)               | 0.355            |
| OI on D2                  | <b>5.9 (4.3, 9.5)</b> | <b>10.4 (6.8, 21.2)</b> | <b>&lt;0.001</b> |
| HFOV                      | <b>10 (12.2)</b>      | <b>17 (51.2)</b>        | <b>&lt;0.001</b> |
| Pulmonary vasodilator     | <b>6 (7.3)</b>        | <b>14 (42.4)</b>        | <b>&lt;0.001</b> |
| Prone                     | 27 (32.9)             | 9 (27.3)                | 0.554            |
| Steroids                  | 39 (47.6)             | 20 (60.6)               | 0.206            |
| Neuromuscular blockade    | <b>17 (20.7)</b>      | <b>15 (45.5)</b>        | <b>0.007</b>     |
| Transfusion               | <b>42 (51.2)</b>      | <b>26 (78.8)</b>        | <b>0.007</b>     |
| Air leak                  | 5 (6.1)               | 5 (15.2)                | 0.119            |
| Multiorgan dysfunction    | 65 (79.3)             | 29 (87.9)               | 0.280            |
| Mortality                 | 15 (18.3)             | 9 (27.3)                | 0.284            |
| Ventilator duration, days | 6 (4, 12)             | 9 (4, 19)               | 0.224            |
| PICU duration, days       | 9.5 (5, 15)           | 11 (5, 26)              | 0.623            |

## Discussion

- Patients who had a greater oxygenation deficit were getting PEEP below what was recommended.
- PEEP below recommended may be at higher risk of mortality

## Conclusion

- A PEEP/FIO<sub>2</sub> combination table adapted from the ARDSNet protocol was not associated with improved survival

## Disclosure

- All authors have no conflict of interest and nil financial support to declare

Figure 1. Time-matched PEEP/FIO<sub>2</sub> combinations over the first 7 days of PARDS

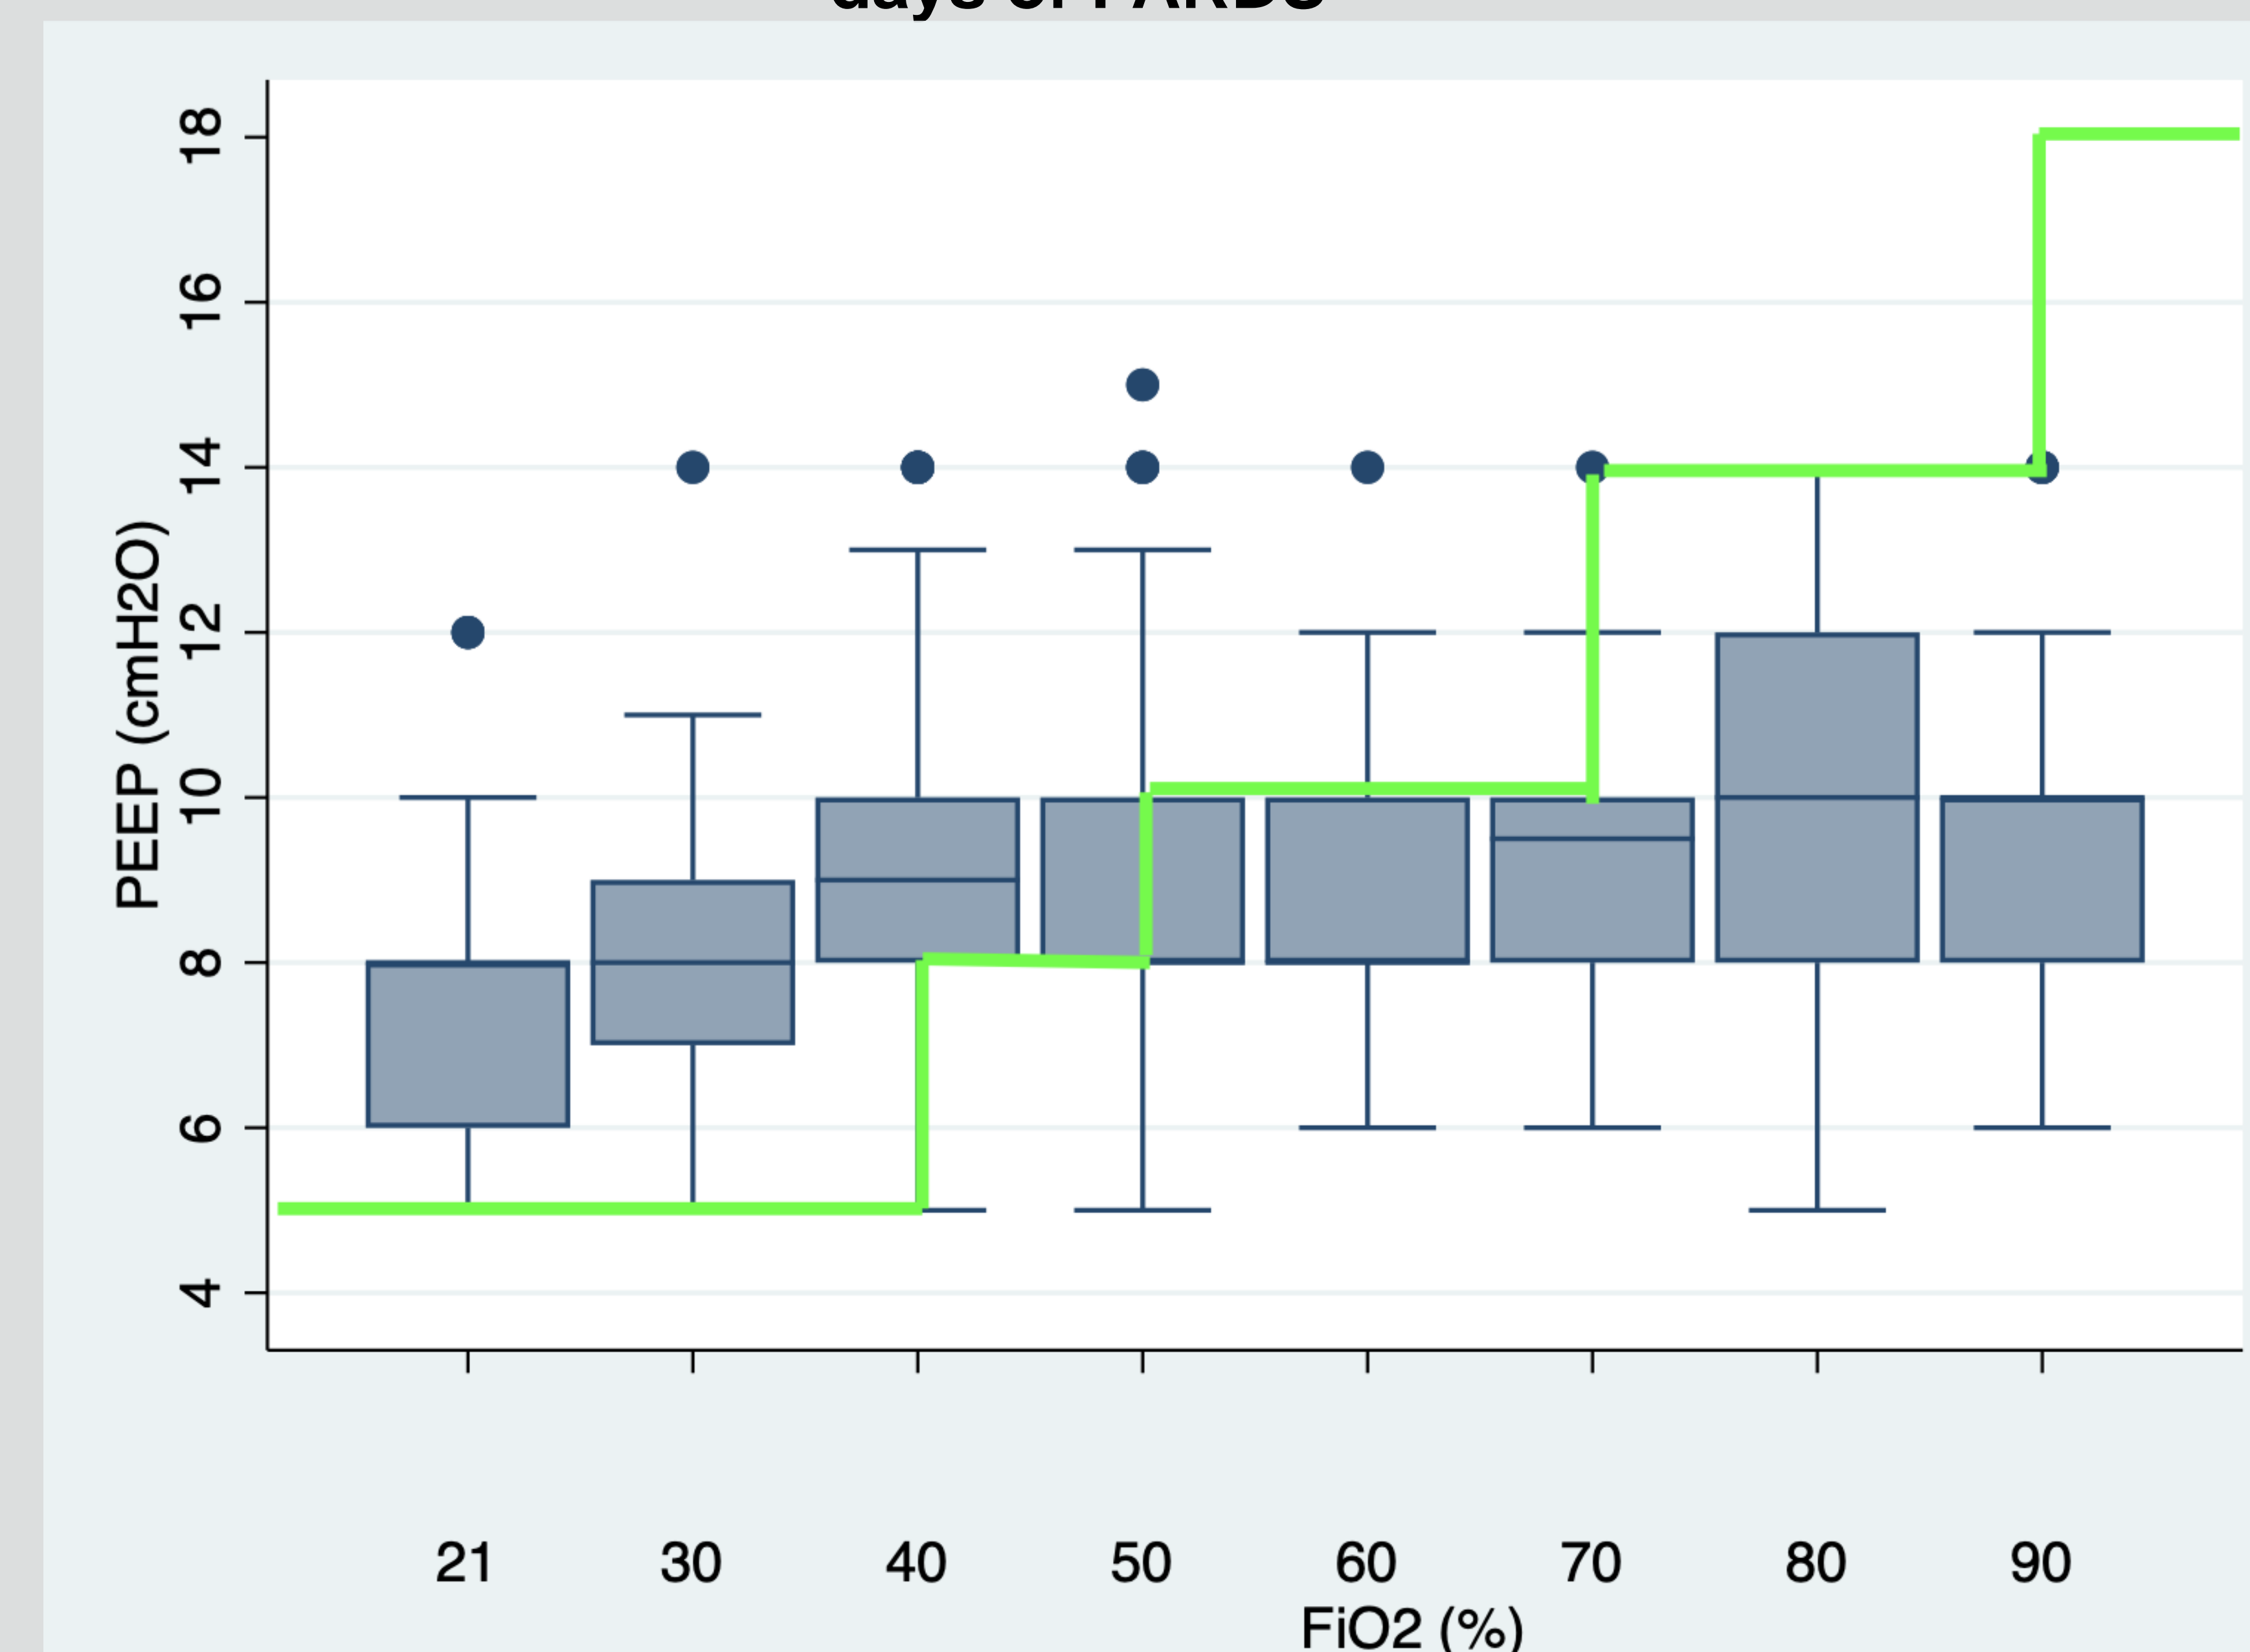

Green line – superimposed PEEP/FIO<sub>2</sub> combination recommended by the modified ARDSNet protocol

Figure 2. Distribution of Median PEEP/FIO<sub>2</sub> Scores and Mortality

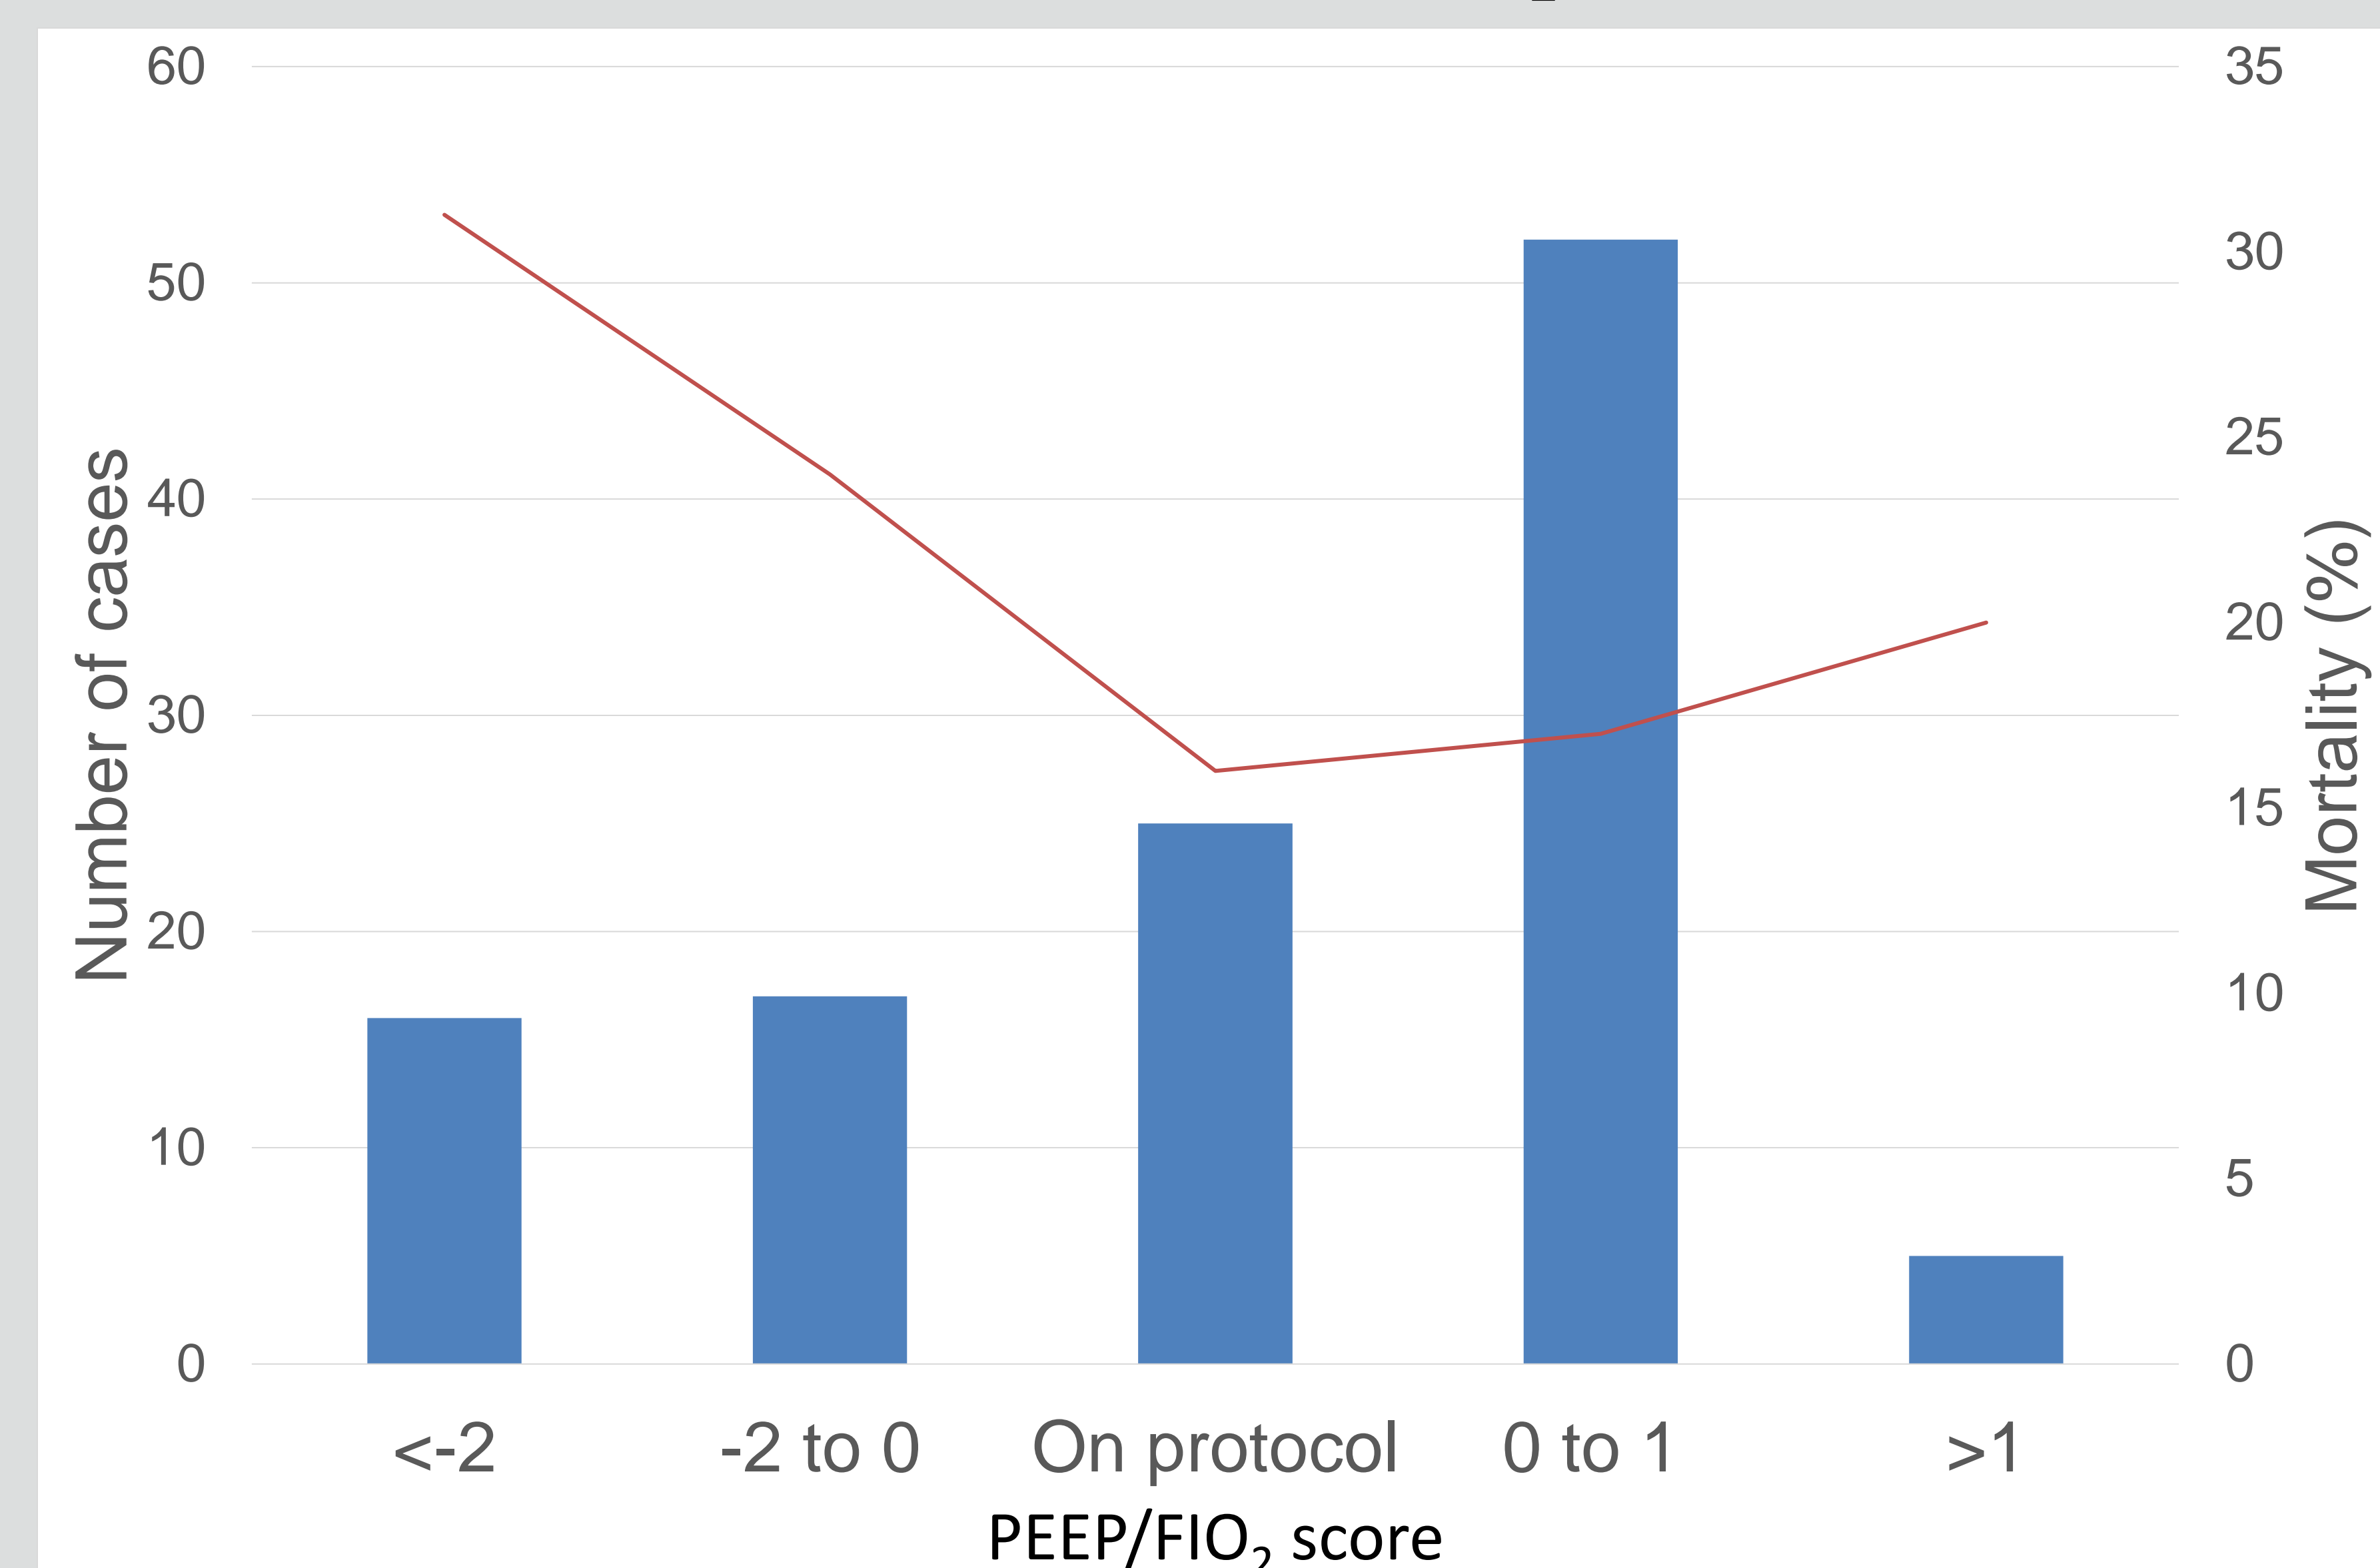

Supplement: 2021_AARC_Congress_PEEP_FIO2_Table_in_Children_with_PARDS.pdf [file 2021_AARC_Congress_PEEP_FIO2_Table_in_Children_with_PARDS.pdf]
